# Supplementary material
Source: Copernicus journal article supplement (doi:10.5194/ms-17-657-2026)
Supplement: Supplementary file [file ms-17-657-2026-supplement-title-page.pdf › ms-17-657-2026-supplement-title-page.pdf]

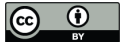

## *Supplement of*

# **A primary–secondary admittance control strategy for dual-Stewart platforms in confined-space aircraft component alignment**

**Huijun Yu et al.**

*Correspondence to:* Pengyuan Zhao ([zhaopengyuan@uestc.edu.cn](mailto:zhaopengyuan@uestc.edu.cn))

- [ms-17-657-2026-supplement-title-page.pdf](#)
- [Description-Supplementary\\_Video1\\_Co-Simulation.docx](#)
- [Supplementary\\_Video1\\_Co-Simulation.mp4](#)

The copyright of individual parts of the supplement might differ from the article licence.
